# Supplementary material for: Fast proton conductors for low humidity: hydrophilic sulfonated and phosphonated polysilsesquioxanes with Al–O–P crosslinks
Source: Royal Society of Chemistry journal article supplement (doi:10.1039/d4cc00860j), 2024-01-01
Supplement: d4cc00860j1.pdf [file d4cc00860j1.pdf]

Electronically Supplementary Information for:

## Fast proton conductors for low humidity: hydrophilic sulfonated and phosphonated polysilsesquioxanes with Al–O–P crosslinks

Hiroataka Itakura, Masanao Ishijima, and Koichi Kajihara\*

Department of Applied Chemistry for Environment,  
Graduate School of Urban Environmental Sciences, Tokyo Metropolitan University  
1-1 Minami-Osawa, Hachioji, Tokyo 192-0397, Japan  
\*E-mail : [kkaji@tmu.ac.jp](mailto:kkaji@tmu.ac.jp)

### Experimental procedure

Dilute hydrochloric acid was added at once promptly to a mixture of (3-sulphanylpropyl)trimethoxysilane (3-SPTMS, 8 mmol, Tokyo Chemical Industry) and (2-diethylphosphatoethyl)triethoxysilane (DPTES, 2 mmol, Gelest) at a 3-SPTMS : DPTES : H<sub>2</sub>O : HCl molar ratio of 0.8 : 0.2 : 3 : 0.002 and stirred in a sealed container at 20 °C for 3 h. The resulting solution was aged at 80 °C for 1 day without stirring, followed by drying at 60 °C for 3 h in air and 1 day under vacuum. The resulting viscous liquid **1** was oxidized by mixing with 30 wt% hydrogen peroxide (Fujifilm Wako Pure Chemical) at an S : H<sub>2</sub>O<sub>2</sub> molar ratio of 1 : 5 and stirring the mixture at 20 °C for 2 days. Afterward, excess H<sub>2</sub>O<sub>2</sub> was decomposed by immersing a Pt plate in this solution, which was subsequently dried to obtain **2** in powder form. Aluminum (III) chloride hexahydrate (Fujifilm Wako Pure Chemical) and phosphoric acid (PA, Fujifilm Wako Pure Chemical) were dissolved in water and **2** was added at a Si : Al : PA molar ratio of 1 : z<sub>Al</sub> : z<sub>PA</sub>. The mixture was heated at 100 °C for 2 days in a sealed container, followed by drying at 100 °C for 1 day in air. The samples used for the conductivity measurements were obtained by dissolving the resulting solid in water and drying the solution at 60 °C for 1 day in air. The resulting samples were referred to as the combination of z<sub>Al</sub> and z<sub>PA</sub>, i.e., (z<sub>Al</sub>, z<sub>PA</sub>).

As reference materials for X-ray diffraction (XRD) and attenuated total reflection Fourier transform infrared (ATR-FT-IR) measurements, poly(R-SQ)s with 3-sulphanylpropyl groups (poly(3-SP-SQ)) and *n*-propyl groups (poly(Pr-SQ)) were prepared. Dilute hydrochloric acid was added to 3-SPTMS or *n*-propyltrimethoxysilane (Tokyo Chemical Industry) at an alkoxy silane : H<sub>2</sub>O : HCl molar ratio of 1 : 3 : 0.002, followed by stirring, aging, and drying under the same conditions as those used for the preparation of **1**.

Liquid-state <sup>1</sup>H, <sup>29</sup>Si, and <sup>31</sup>P nuclear magnetic resonance (NMR, JNM-ECS300, JEOL) spectra were recorded in a single pulse sequence with pulse flip angles of 45, 30, and 30°, respectively, and relaxation delays of 5, 20, and 5 s, respectively. Gel permeation chromatography (GPC) was performed using a Shodex KF-804L column, refractive index detector (RID-10A, Shimadzu), and tetrahydrofuran as the eluent (flow rate of 1.0 mL min<sup>-1</sup>). Molar mass distribution curves were derived using standard polystyrene samples and were used to calculate

the number- and mass-average molar masses ( $M_n$  and  $M_m$ , respectively). X-ray diffractometers (RINT-TTR III, Rigaku and NanoViewer, Rigaku) were used to measure XRD and small-angle X-ray scattering (SAXS) patterns with Cu  $K\alpha$  radiation. The resulting diffraction patterns were plotted as a function of scattering vector  $Q = 4\pi \sin \theta / \lambda$ . ATR-FT-IR measurements were conducted at room temperature with a FT-IR spectrometer (FT/IR-6100, JASCO) and an ATR attachment with a diamond prism (ATR PRO670H-S). Before the ATR-FT-IR measurements, several samples were subjected to heat treatment up to 200 °C for 24 h in air. Simultaneous thermogravimetric and differential thermal analyses (TG-DTA, STA-7300, Hitachi) were performed at a heating rate of 10 °C min<sup>-1</sup> in air in a platinum pan containing ~8 mg of powdered sample. The ac conductivity was evaluated using an electrochemical analyzer (SP-200, Bio-Logic) with a frequency range from 200 kHz to 1 Hz and an ac amplitude of 50 mV. Temperature was maintained between 40 and 120 °C in a conventional air-circulating oven (DKM300, Yamato) in air without humidity control (relative humidity of ~20 %RH at 40 °C and ~1 %RH at 120 °C). The sample (~1–2 mm thick) was sandwiched with Au electrodes (5 mm $\phi$ ) and equilibrated at each temperature by maintaining 1 h prior to the measurement. Resistance  $R$  was obtained from the intercept of the extrapolation of the Nyquist plot on the real axis, and ac conductivity  $\sigma_{ac}$  was calculated from the equation  $\sigma_{ac} = t/(RA)$ , where  $t$  is sample thickness and  $A$  is electrode area.

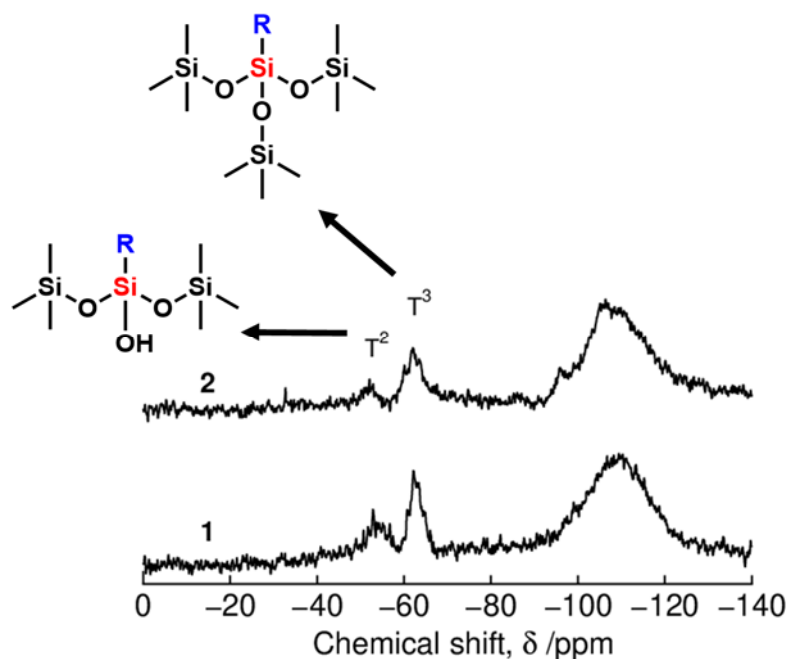

**Fig. S1**  $^{29}\text{Si}$  NMR spectra of **1** (59.6 MHz,  $\text{CDCl}_3$ ) and **2** (59.6 MHz,  $\text{D}_2\text{O}$ ). The broad signal peaked at  $-110$  ppm originates from the silica sample tube. The superscripts in T denote the number of bridging oxygen atoms bonded to the respective T (or SQ) units.

**Table S1** Fractions of  $\text{T}^1$ ,  $\text{T}^2$ , and  $\text{T}^3$  units ( $f_{\text{T}^1}$ ,  $f_{\text{T}^2}$ , and  $f_{\text{T}^3}$ , respectively), average number of bridging oxygen atoms per Si ( $\langle m \rangle$ ) evaluated from the equation  $\langle m \rangle = f_{\text{T}^1} + 2f_{\text{T}^2} + 3f_{\text{T}^3}$ , fractions of residual SiOMe, SiOEt, and SiOH groups ( $f_{\text{SiOMe}}$ ,  $f_{\text{SiOEt}}$ , and  $f_{\text{SiOH}}$ , respectively) of **1** and **2**. The fraction of SiOH groups ( $f_{\text{SiOH}}$ ) was calculated based on the prediction that oxygen atoms bonded to Si belong to either the bridging oxygen atoms, residual SiOMe or SiOEt groups, or SiOH groups ( $f_{\text{SiOH}} = 1 - \langle m \rangle / 3 - 0.8f_{\text{SiOMe}} - 0.2f_{\text{SiOEt}}$ ).

| Sample   | $f_{\text{T}^1}$ | $f_{\text{T}^2}$ | $f_{\text{T}^3}$ | $\langle m \rangle$ | $f_{\text{SiOMe}}$ | $f_{\text{SiOEt}}$ | $f_{\text{SiOH}}$ |
|----------|------------------|------------------|------------------|---------------------|--------------------|--------------------|-------------------|
| <b>1</b> | –                | 0.35             | 0.65             | 2.65                | 0.01               | 0.06               | 0.10              |
| <b>2</b> | –                | 0.32             | 0.68             | 2.68                | 0.00               | 0.00               | 0.11              |

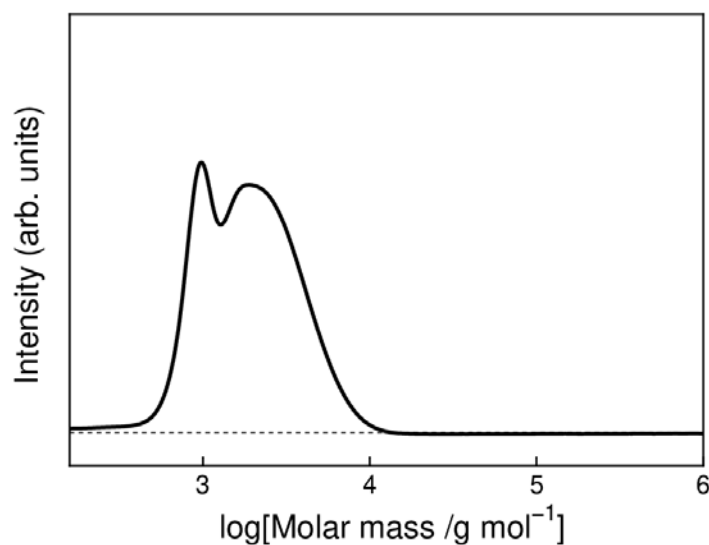

**Fig. S2** Polystyrene-equivalent molar mass distribution curve of **1**.

**Table S2** The peak assignments of  $^{31}\text{P}$  NMR spectra shown in Fig. 3(a) on the basis of the assignments reported in refs. 1 and 2.

| Peak | Assignment                                                                                                                                                                                                                                                                                                     |
|------|----------------------------------------------------------------------------------------------------------------------------------------------------------------------------------------------------------------------------------------------------------------------------------------------------------------|
| A    | Free phosphoric acid molecules and ions,<br>$\text{H}_3\text{PO}_4$ , $\text{H}_2\text{PO}_4^-$ , $\text{H}_6\text{P}_2\text{O}_8$ , $\text{H}_5\text{P}_2\text{O}_8^-$                                                                                                                                        |
| B    | P nuclei in $\text{H}_3\text{PO}_4$ molecules bonded to Al and hydrogen-bonded to other<br>$\text{H}_3\text{PO}_4$ molecules,<br>$[\text{Al}(\text{H}_3\text{PO}_4)(\text{H}_3\text{PO}_4)_n]^{m+}$ , ( $n \geq 1$ , $m$ is undetermined)                                                                      |
| C    | P nuclei in $\text{H}_2\text{PO}_4^-$ ligands complexed to Al,<br>$[\text{Al}(\text{H}_2\text{PO}_4)]^{2+}$ and $[\text{Al}(\text{H}_2\text{PO}_4)_2]^+$                                                                                                                                                       |
| D    | P nuclei in $\text{H}_3\text{PO}_4$ complexed to Al,<br>$[\text{Al}(\text{H}_3\text{PO}_4)]^{3+}$                                                                                                                                                                                                              |
| B'   | P nuclei in $\text{RPO}(\text{OH})_2$ groups bonded to Al and hydrogen-bonded to<br>other $\text{RPO}(\text{OH})_2$ groups and $\text{H}_3\text{PO}_4$ molecules,<br>$[\text{Al}(\text{RPO}(\text{OH})_2)(\text{RPO}(\text{OH})_2)_n(\text{H}_3\text{PO}_4)_l]^{m+}$ , ( $n + l \geq 1$ , $m$ is undetermined) |
| C'   | P nuclei in $\text{RPO}_2(\text{OH})^-$ ligands bonded to Al,<br>$[\text{Al}(\text{RPO}_2(\text{OH}))]^{2+}$ , $[\text{Al}(\text{RPO}_2(\text{OH}))_2]^+$ , and $[\text{Al}(\text{RPO}_2(\text{OH}))(\text{HPO}_4)]^+$                                                                                         |
| D'   | P nuclei in $\text{RPO}(\text{OH})_2$ groups complexed to Al,<br>$[\text{Al}(\text{RPO}(\text{OH})_2)]^{3+}$                                                                                                                                                                                                   |

**Table S3** Appearances of samples prepared at various  $(z_{Al}, z_{PA})$  values; -: brittle, +: flexible but not tough, ++: flexible and tough, L: liquid. The sample denoted as  $(z_{Al}, z_{PA}) = (0, 0)$  is identical to **2**.

| $z_{Al}$ | $z_{PA}$ |     |     |     |     |     |
|----------|----------|-----|-----|-----|-----|-----|
|          | 0        | 0.2 | 0.3 | 0.4 | 0.5 | 0.6 |
| 0        | -        | +   |     |     | L   |     |
| 0.2      |          | ++  | ++  | ++  | ++  | L   |
| 0.3      |          | -   | ++  | ++  | ++  |     |
| 0.4      | -        | -   | ++  | ++  | ++  |     |

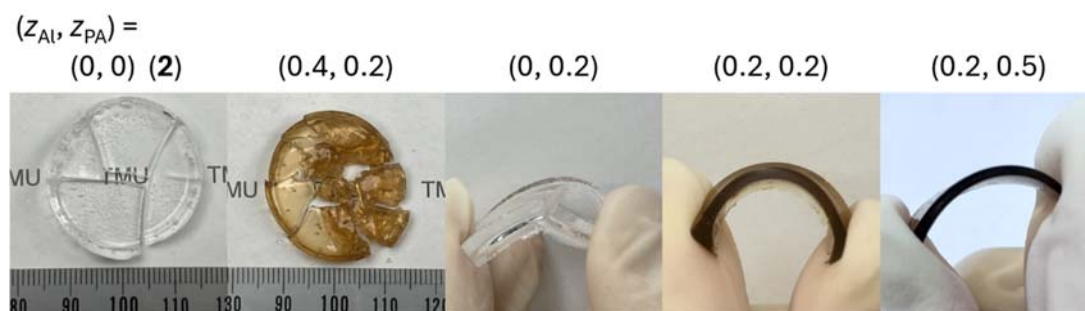

**Fig. S3** Typical appearance of samples listed in Table S3. The samples prepared at  $(z_{Al}, z_{PA}) = (0, 0)$  (**2**) and  $(0.4, 0.2)$  were brittle and fractured easily. The sample prepared at  $(z_{Al}, z_{PA}) = (0.2, 0)$  was soft but not tough, and split upon bending. The samples prepared at  $(z_{Al}, z_{PA}) = (0.2, 0.2)$  and  $(0.2, 0.5)$  were flexible and tough.

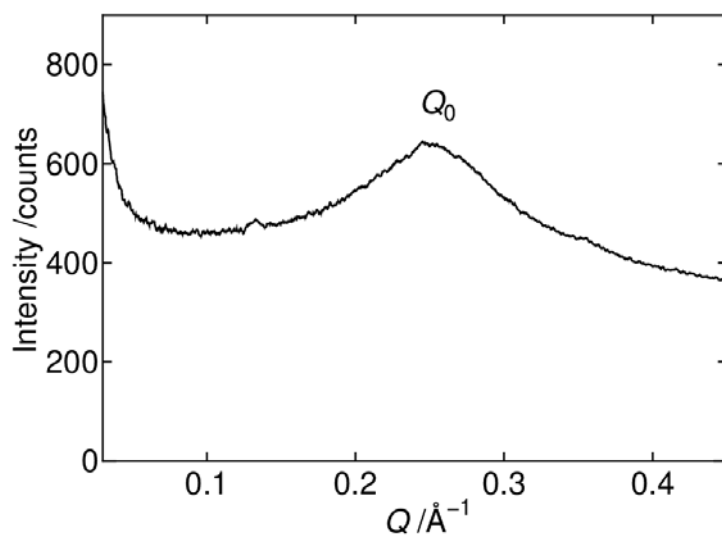

**Fig. S4** SAXS pattern of the sample prepared at  $(z_{Al}, z_{PA}) = (0.2, 0.5)$ .

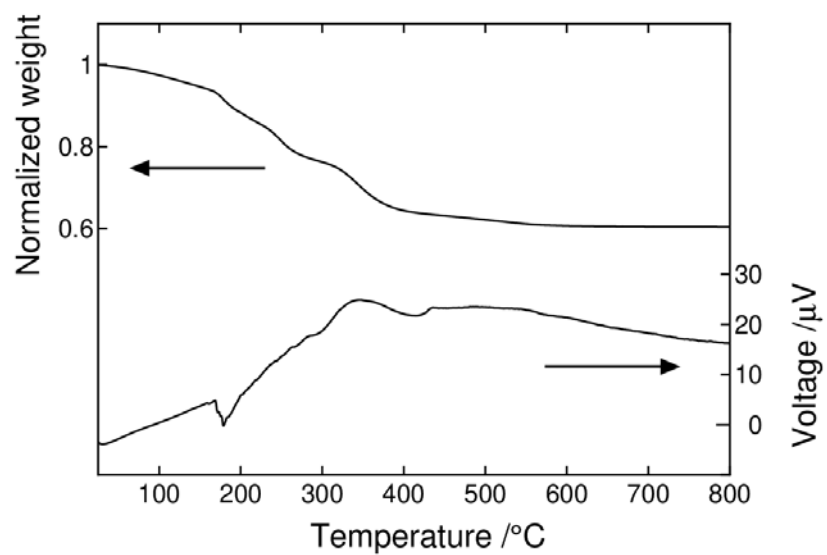

**Fig. S5** TG-DTA curves of the sample prepared at  $(z_{Al}, z_{PA}) = (0.2, 0.5)$ .

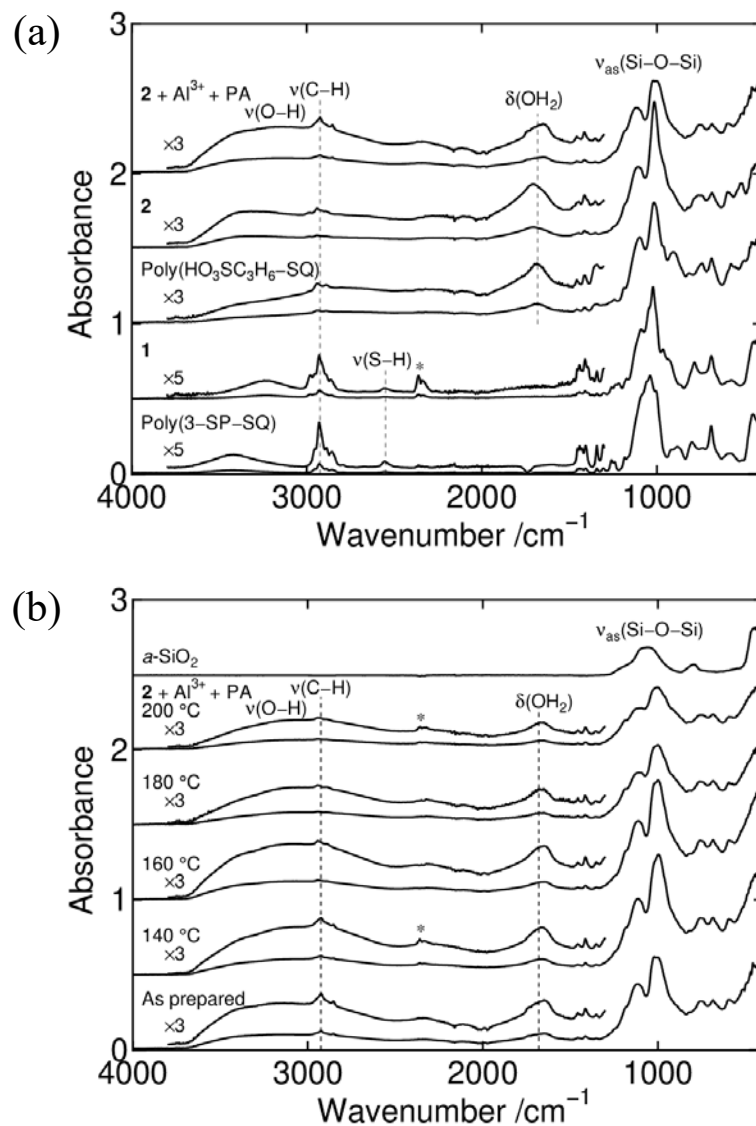

**Fig. S6** ATR-FT-IR spectra of samples measured at room temperature. Successive curves have shifted ordinates. Spectra magnified 3 or 5 times are also shown between 1300 and 3800 cm<sup>-1</sup>. The asterisks at ~2350 cm<sup>-1</sup> indicate the absorption band of CO<sub>2</sub> in air. (a) Poly(3-SP-SQ), **1**, poly(HO<sub>3</sub>SC<sub>3</sub>H<sub>6</sub>-SQ) (oxidation product of poly(3-SP-SQ)), **2**, and the sample prepared by mixing **2** with Al<sup>3+</sup> ions and PA at ( $z_{Al}$ ,  $z_{PA}$ ) = (0.2, 0.5). (b) The sample prepared by mixing **2** with Al<sup>3+</sup> ions and PA at ( $z_{Al}$ ,  $z_{PA}$ ) = (0.2, 0.5); as prepared one and those subjected to heat treatment at designated temperatures for 24 h in air. A spectrum of amorphous SiO<sub>2</sub> (*a*-SiO<sub>2</sub>) powder is also shown for comparison.

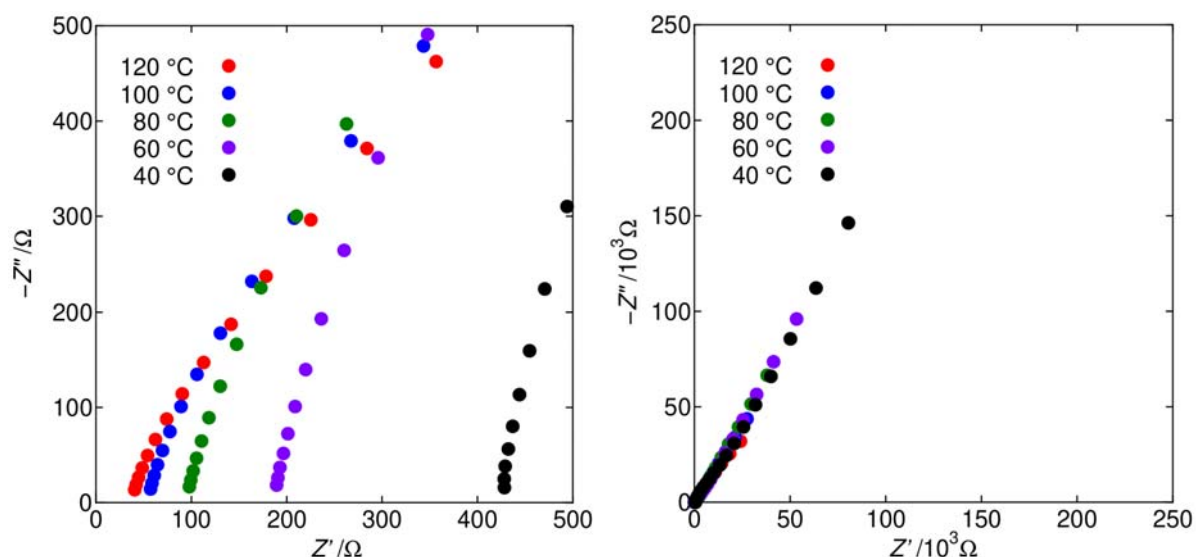

**Fig. S7** Magnified (left) and full-range (right) Nyquist plots of the sample prepared at  $(z_{Al}, z_{PA}) = (0.2, 0.5)$ .

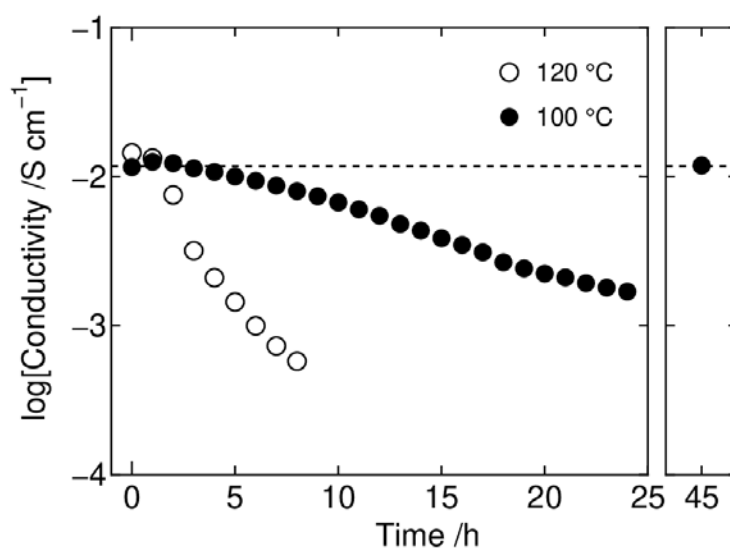

**Fig. S8** Variation of ac conductivity at 100 and 120 °C with time of the samples prepared at  $(z_{Al}, z_{PA}) = (0.2, 0.5)$  similarly to the one shown in Fig. 4. The right panel shows the conductivity at 100 °C after rest at room temperature for ~20 h of the sample subjected to the conductivity measurement at 100 °C for 24 h (left panel). Prior to starting measurements at  $t = 0$  and 45 h, each sample was equilibrated at respective temperature by maintaining for 1 h. At 120 °C, vapor bubbles were formed between the sample and Au electrodes at ~2 h. They deformed the sample, and resulted in the partial loss of electrical contact and a sudden conductivity decrease.

## References

- 1 J. W. Akitt, N. N. Greenwood and G. D. Lester, *J. Chem. Soc. A*, 1971, 2450–2457.
- 2 R. F. Mortlock, A. T. Bell and C. J. Radke, *J. Phys. Chem.*, 1993, **97**, 767–774.
